# Supplementary material for: Enhancing Molecular Testing for Effective Delivery of Actionable Gene Diagnostics
Source: MDPI journal article supplement (doi:10.3390/bioengineering9120745), 2022-12-01
Supplement: s1 [file s1]

## Review

# Enhancing Molecular Testing for Effective Delivery of Actionable Gene Diagnostics

Árpád Ferenc Kovács \*, Zaránd Némethi, Tünde Abonyi, György Fekete and Gábor T Kovács

2nd Department of Paediatrics, Semmelweis University, Üllői út 26, Budapest 1085, Hungary

\* Correspondence: kovacs.arpad@med.semmelweis-univ.hu

**Table S1.** Relevant data on human cell line samples processed by ONT.

| Region of interest                                | Sample                              | DNA extraction                                                | Library Prep     | Sequencing platform | Results                                                                         | Validation                        | Reference |
|---------------------------------------------------|-------------------------------------|---------------------------------------------------------------|------------------|---------------------|---------------------------------------------------------------------------------|-----------------------------------|-----------|
| <i>ABCB1</i>                                      | THP-1 cell line                     | QIAamp DNA mini kit                                           | LSK108 or LSK109 | MinION              | Structural variants, <i>ABCB1</i> translocation detected by nanopore sequencing | Chip seq, NGS                     | [62]      |
| Chromosome 1                                      | Lymphoblastoid cell line            | Chromosome preparation                                        | LSK-109          | MinION              | Highly continuous and selective assembly of chromosome 1                        | NA                                | [63]      |
| <i>Gene fusion BCR-ABL1 PAX5-AUTS2 HAS2-PLAG1</i> | K562 cell line                      | RNA - RNeasy system                                           | LSK-108          | MinION              | Fusions were detected                                                           | NGS - Illumina                    | [39]      |
| Short tandem repeats                              | HiPSC line                          | HMW DNA preparation with a modified phenol-chlorophorm method | LSK-108, 109     | MinION, PromethION  | STR expansions                                                                  | Southern-blot                     | [36]      |
| NMD-targeted isoforms                             | HeLa cell line                      | Total RNA: GenElute Mammalian Total RNA Miniprep Kit          | DCS-108          | GridION             | identification of many novel NMD-sensitive mRNAs                                | NGS - Illumina                    | [64]      |
| Evaluate CpG methylation                          | GM12878 lymphoblast cell line       | Phenol-chlorophorm                                            | LSK-108          | MinION              | NS allows to generate human epigenome                                           | Bisulfite sequencing              | [65]      |
| <i>TP53, BRAF, KRAS</i>                           | MDA-MB-231, MCF-7, MCF-10A, GM12878 | Circulomics CBB kit                                           | LSK-109          | MinION              | SNV, methylation                                                                | whole-genome bisulfite sequencing | [14]      |
| <i>whole genome</i>                               | GM12878                             | QIamp DNA Mini kit (Qiagen)                                   | LSK-108, RAD002  | MinION              | assembly of human genome 99,88%                                                 | Non-validated                     | [66]      |

NA—no available data, NGS—next generation sequencing.

## References

- Williams, M.S.; Basmal, N.J.; Amaral, F.M.R.; Williams, G.; Weightman, J.P.; Breitwieser, W.; Nelson, L.; Taylor, S.S.; Wiseman, D.H.; Somerville, T.C.P. Targeted nanopore sequencing for the identification of *ABCB1* promoter translocations in cancer. *BMC Cancer* **2020**, *20*, 1075. <https://doi.org/10.1186/s12885-020-07571-0>.
- Kuderna, L.F.K.; Solís-Moruno, M.; Batlle-Masó, L.; Julià, E.; Lizano, E.; Anglada, R.; Ramírez, E.; Bote, A.; Tormo, M.; Marqués-Bonet, T.; et al. Flow Sorting Enrichment and Nanopore Sequencing of Chromosome 1 From a Chinese Individual. *Front. Genet.* **2020**, *10*, 1315. <https://doi.org/10.3389/fgene.2019.01315>.
- Karousis, E.D.; Gypas, F.; Zavolan, M.; Mühlemann, O. Nanopore sequencing reveals endogenous NMD-targeted isoforms in human cells. *Genome Biol.* **2021**, *22*, 223.
- Lee, I.; Razaghi, R.; Gilpatrick, T.; Molnar, M.; Gershman, A.; Sadowski, N.; Sedlazeck, F.J.; Hansen, K.D.; Simpson, J.T.; Timp, W. Simultaneous profiling of chromatin accessibility and methylation on human cell lines with nanopore sequencing. *Nat. Methods* **2020**, *17*, 1191–1199. <https://doi.org/10.1038/s41592-020-01000-7>.
- Jain, M.; Koren, S.; Miga, K.H.; Quick, J.; Rand, A.C.; Sasani, T.A.; Tyson, J.R.; Beggs, A.D.; Dilthey, A.T.; Fiddes, I.T.; et al. Nanopore sequencing and assembly of a human genome with ultra-long reads. *Nat. Biotechnol.* **2018**, *36*, 338–345. <https://doi.org/10.1038/nbt.4060>.
